# Supplementary material
Source: PubMed Central journal article supplement (PMC4325107)
Supplement: JB.02284-14_zjb999093512so1.pdf [file JB.02284-14_zjb999093512so1.pdf]

## Supplementary Data

**Table S1: *Listeria monocytogenes* strains used in this study.**

| Strain                                          | Strain#  | Description                                                                                                                            | Source         |
|-------------------------------------------------|----------|----------------------------------------------------------------------------------------------------------------------------------------|----------------|
| WT                                              | -        | Wild type <i>Listeria monocytogenes</i> 10403S strain                                                                                  | (1)            |
| $\Delta secA2$                                  | DP-L4342 | In frame deletion of <i>lmo0583</i>                                                                                                    | (2)            |
| $\Delta pgdA\Delta oatA$                        | DP-L5220 | In frame deletion of <i>lmo0415</i> and <i>lmo1291</i>                                                                                 | (3)            |
| $\Delta iap$                                    | DP-L4611 | In frame deletion of <i>lmo0582</i>                                                                                                    | (4)            |
| $\Delta lmo2769$                                | DP-L6209 | In frame deletion of <i>lmo2769</i>                                                                                                    | This study     |
| $\Delta lmo2769\Delta secA2$                    | DP-L6210 | In frame deletion of <i>lmo2769</i> and $\Delta secA2$                                                                                 | This study     |
| $\Delta lmo2769\Delta secA2$ +pPL2:2767-2769    | DP-L6211 | $\Delta lmo2769\Delta secA2$ strain complemented with pPL2 <i>lmo2767-2769</i> construct                                               | This study     |
| R57+pPL2:2767-2769                              | DP-L6212 | R57 strain complemented with pPL2 <i>lmo2767-2769</i> construct                                                                        | This study     |
| <i>lmo2768</i> ::Tn                             | DP-L6155 | <i>HimarI</i> Transposon insert in <i>lmo2768</i>                                                                                      | (5)            |
| $\Delta secA2:lmo2768$ ::Tn                     | DP-L6213 | $\Delta secA2$ strain with <i>HimarI</i> Transposon insert in <i>lmo2768</i>                                                           | This study     |
| $\Delta lmo1721$                                | DP-L6214 | In frame deletion of <i>lmo1721</i>                                                                                                    | This study     |
| $\Delta lmo1721\Delta secA2$                    | DP-L6215 | In frame deletion of <i>lmo1721</i> and <i>secA2</i>                                                                                   | This study     |
| $\Delta lmo2769\Delta lmo1721$                  | DP-L6216 | In frame deletion of <i>lmo1721</i> and <i>lmo2769</i>                                                                                 | This study     |
| $\Delta lmo2769\Delta lmo1721\Delta secA2$      | DP-L6217 | In frame deletion of <i>lmo1721</i> , <i>lmo2769</i> and <i>secA2</i>                                                                  | This study     |
| $\Delta secA2:lmo2637$ ::Tn                     | DP-L6218 | <i>HimarI</i> Transposon insert in <i>lmo2637</i> in $\Delta secA2$ strain <b>with</b> WT <i>secY</i>                                  | This study     |
| $\Delta secA2prlA1$                             | DP-L6219 | <i>HimarI</i> Transposon insert in <i>lmo2637</i> in $\Delta secA2$ strain <b>with</b> <i>secY</i> (G408R)                             | This study     |
| <i>lmo2637</i> ::Tn                             | DP-L6220 | <i>HimarI</i> Transposon insert in <i>lmo2637</i> in 10403S (WT) strain <b>with</b> WT <i>secY</i>                                     | Lab collection |
| <i>prlA1</i>                                    | DP-L6221 | <i>HimarI</i> Transposon insert in <i>lmo2637</i> in WT strain <b>with</b> <i>secY</i> (G408R)                                         | This study     |
| $\Delta lmo2769\Delta secA2:lmo2637$ ::Tn       | DP-L6222 | <i>HimarI</i> Transposon insert in <i>lmo2637</i> in $\Delta lmo2769\Delta secA2$ strain <b>with</b> WT <i>secY</i>                    | This study     |
| $\Delta lmo2769\Delta secA2prlA1$               | DP-L6223 | <i>HimarI</i> Transposon insert in <i>lmo2637</i> in $\Delta lmo2769\Delta secA2$ strain <b>with</b> <i>secY</i> (G408R)               | This study     |
| $\Delta lmo1721\Delta secA2prlA1$               | DP-L6224 | <i>HimarI</i> Transposon insert in <i>lmo2637</i> in $\Delta lmo1721\Delta secA2$ strain <b>with</b> <i>secY</i> (G408R)               | This study     |
| $\Delta lmo2769\Delta lmo1721\Delta secA2$ ::Tn | DP-L6225 | <i>HimarI</i> Transposon insert in <i>lmo2637</i> in $\Delta lmo2769\Delta lmo1721\Delta secA2$ strain <b>with</b> WT <i>secY</i>      | This study     |
| $\Delta lmo2769\Delta lmo1721\Delta secA2prlA1$ | DP-L6226 | <i>HimarI</i> Transposon insert in <i>lmo2637</i> in $\Delta lmo2769\Delta lmo1721\Delta secA2$ strain <b>with</b> <i>secY</i> (G408R) | This study     |
| R57 <i>prlA1</i>                                | DP-L6227 | <i>HimarI</i> Transposon insert in <i>lmo2637</i> in strain R57 <b>with</b> the <i>secY</i> (G408R)                                    | This study     |
| R57: <i>lmo2637</i> ::Tn                        | DP-L6228 | <i>HimarI</i> Transposon insert in <i>lmo2637</i> in strain R57 <b>with</b> WT <i>secY</i>                                             | This study     |

**Table S2: Deletion and complement primer sequences.**

| <b>Primer</b> | <b>5'-3' Sequence</b>                              | <b>Description</b>               |
|---------------|----------------------------------------------------|----------------------------------|
| JD17          | ATTAGTCGACCTCGGAGTTTGGTGTCTTCTGG                   | <i>lmo2769</i> deletion primer A |
| JD18          | ATTACTGCAGAAACGATGCGGACTCAAACG                     | <i>lmo2769</i> deletion primer D |
| JD19          | CTCCCGTCTGTTTTAAATCTCGTATTTAGTTAAGTTCCGAATTTTCAT   | <i>lmo2769</i> deletion primer B |
| JD20          | ATGAAAATTCGGA ACTTAACTAAA TACGAGATTTAAAACAGACGGGAG | <i>lmo2769</i> deletion primer C |
| JD30          | ATTAGTCGAC ACAGATGTAGCGGCTCGTGG                    | <i>lmo1721</i> deletion primer A |
| JD31          | GATTCCTTTTTCTTAATTTTCTTCGACTTCTTCTTTTCTACTAGACAT   | <i>lmo1721</i> deletion primer B |
| JD32          | ATGTCTAGTAGAAAAGAAGAAGTCGAAGAAAATTAAGAAAAGGAATC    | <i>lmo1721</i> deletion primer C |
| JD33          | ATTACTGCAGCGCCGTCCATTGTTCCATAG                     | <i>lmo1721</i> deletion primer D |
| JD46          | ATTAGTCGACCTGGATGTGGCGTAAGGG                       | <i>lmo2769-lmo2767</i> F' primer |
| JD47          | ATTAGGATCCCATAACTTTGTCCCGATTGTCC                   | <i>lmo2769-lmo2767</i> R' primer |

1 **Table S3: Colony and microscopic morphology of *ΔsecA2* revertants.**

| Strain | Colony | Chaining <sup>#</sup> | Lysozyme <sup>§</sup> | Strain | Colony | Chaining <sup>#</sup> | Lysozyme <sup>§</sup> |
|--------|--------|-----------------------|-----------------------|--------|--------|-----------------------|-----------------------|
| R1     | smooth | +                     | 1.79 (±0.10)          | R33    | rough  | +++                   | 1.71 (±0.00)          |
| R2     | rough  | ++++                  | 1.64 (±0.10)          | R34    | smooth | ++ <sup>€</sup>       | 2.67 (±0.20)          |
| R3.1   | smooth | +                     | 1.71 (±0.00)          | R35    | smooth | ++                    | 2.67 (±0.60)          |
| R3.2   | rough  | ++++                  | 1.71 (±0.20)          | R36    | smooth | +                     | 1.64 (±0.10)          |
| R4     | smooth | +                     | 1.64 (±0.10)          | R37    | smooth | ++                    | 1.71 (±0.00)          |
| R5     | smooth | ++                    | 1.71 (±0.00)          | R38    | smooth | ++                    | 1.57 (±0.00)          |
| R6     | rough  | +++                   | 1.57 (±0.00)          | R39    | rough  | ++++                  | 2.00 (±0.20)          |
| R7     | smooth | +                     | 2.36 (±0.10)          | R40    | rough  | +++ <sup>€</sup>      | 1.79 (±0.10)          |
| R8     | rough  | +++                   | 2.50 (±0.10)          | R41    | smooth | +                     | 1.79 (±0.10)          |
| R9     | rough  | +++                   | 2.17 (±0.30)          | R42    | smooth | +                     | 2.14 (±0.20)          |
| R10.1  | smooth | ++                    | 1.71 (±0.00)          | R43    | rough  | +++                   | 1.57 (±0.20)          |
| R10.2  | rough  | +++                   | 1.86 (±0.00)          | R44    | smooth | +                     | 2.21 (±0.30)          |
| R11    | smooth | ++ <sup>€</sup>       | 1.86 (±0.00)          | R45    | smooth | +                     | 2.29 (±0.20)          |
| R12    | smooth | ++                    | 2.29 (±0.00)          | R46    | smooth | +                     | 2.50 (±0.10)          |
| R13    | rough  | +++                   | 1.64 (±0.10)          | R47.1  | smooth | +                     | 2.57 (±0.00)          |
| R14    | rough  | +++                   | 1.93 (±0.10)          | R47.2  | rough  | +++                   | 2.64 (±0.10)          |
| R15    | rough  | +++                   | 1.86 (±0.00)          | R48    | smooth | +                     | 1.71 (±0.00)          |
| R16    | smooth | +                     | 1.71 (±0.00)          | R49    | smooth | ++                    | 1.71 (±0.20)          |
| R17    | smooth | ++ <sup>€</sup>       | 1.71 (±0.00)          | R50    | smooth | ++                    | 2.21 (±0.10)          |
| R18.1  | smooth | + <sup>€</sup>        | 1.71 (±0.00)          | R51    | rough  | +                     | 1.71 (±0.00)          |
| R18.2  | rough  | ++++                  | 1.64 (±0.10)          | R52    | smooth | +                     | 1.64 (±0.10)          |
| R19    | rough  | ++++                  | 1.79 (±0.10)          | R53    | smooth | +                     | 2.29 (±0.20)          |
| R20    | rough  | +++                   | 1.79 (±0.10)          | R54    | smooth | ++                    | 2.57 (±0.20)          |
| R21    | smooth | ++                    | 1.93 (±0.10)          | R55    | rough  | +++                   | 1.86 (±0.40)          |
| R22    | rough  | +++                   | 1.79 (±0.10)          | R56    | smooth | ++                    | 2.14 (±0.00)          |
| R23    | smooth | +                     | 2.10 (±0.40)          | R57    | smooth | +                     | 2.87 (±0.40)          |
| R24    | smooth | + <sup>€</sup>        | 2.14 (±0.20)          | R58    | smooth | +                     | 1.86 (±0.20)          |
| R25    | rough  | ++++                  | 1.64 (±0.10)          | R59    | smooth | +                     | 1.79 (±0.10)          |
| R26    | smooth | + <sup>€</sup>        | 2.93 (±0.30)          | R60.1  | smooth | ++                    | 2.49 (±0.20)          |
| R27    | rough  | +++                   | 1.64 (±0.10)          | R60.2  | rough  | +++                   | 1.71 (±0.00)          |
| R28    | smooth | ++                    | 1.71 (±0.00)          | R61    | smooth | +                     | 2.29 (±0.00)          |
| R29    | smooth | +                     | 1.71 (±0.20)          | R62    | smooth | ++                    | 2.50 (±0.10)          |
| R30    | smooth | +                     | 3.36 (±0.10)          | R63.1  | smooth | ++                    | 2.21 (±0.10)          |
| R31    | rough  | +++                   | 1.79 (±0.10)          | R63.2  | rough  | +++                   | 2.21 (±0.10)          |
| R32    | smooth | ++ <sup>€</sup>       | 1.64 (±0.10)          | R64    | smooth | + <sup>€</sup>        | 3.00 (±0.20)          |

2 <sup>#</sup> Microscopy was conducted on stationary phase cells grown in BHI at 37°C. Chaining phenotype was scored from  
3 + to +++++, where WT = + and *ΔsecA2* =++++ according to the following algorithm:

- 4 + = single cells and chains of up to 3 cells/field x40 magnification  
5 ++ = single cells and chains of up to 4 cells/field x40 magnification  
6 +++ = chains of up to 6 cells/field x40 magnification  
7 ++++ = chains of >6 cells/field x40 magnification

8 <sup>€</sup> Pleomorphic cells

9 <sup>§</sup> Disk diffusion susceptibility to 1mg of lysozyme expressed as ratio of WT, where a ratio >1 indicates increased  
10 susceptibility. Values in parenthesis represent standard deviations.

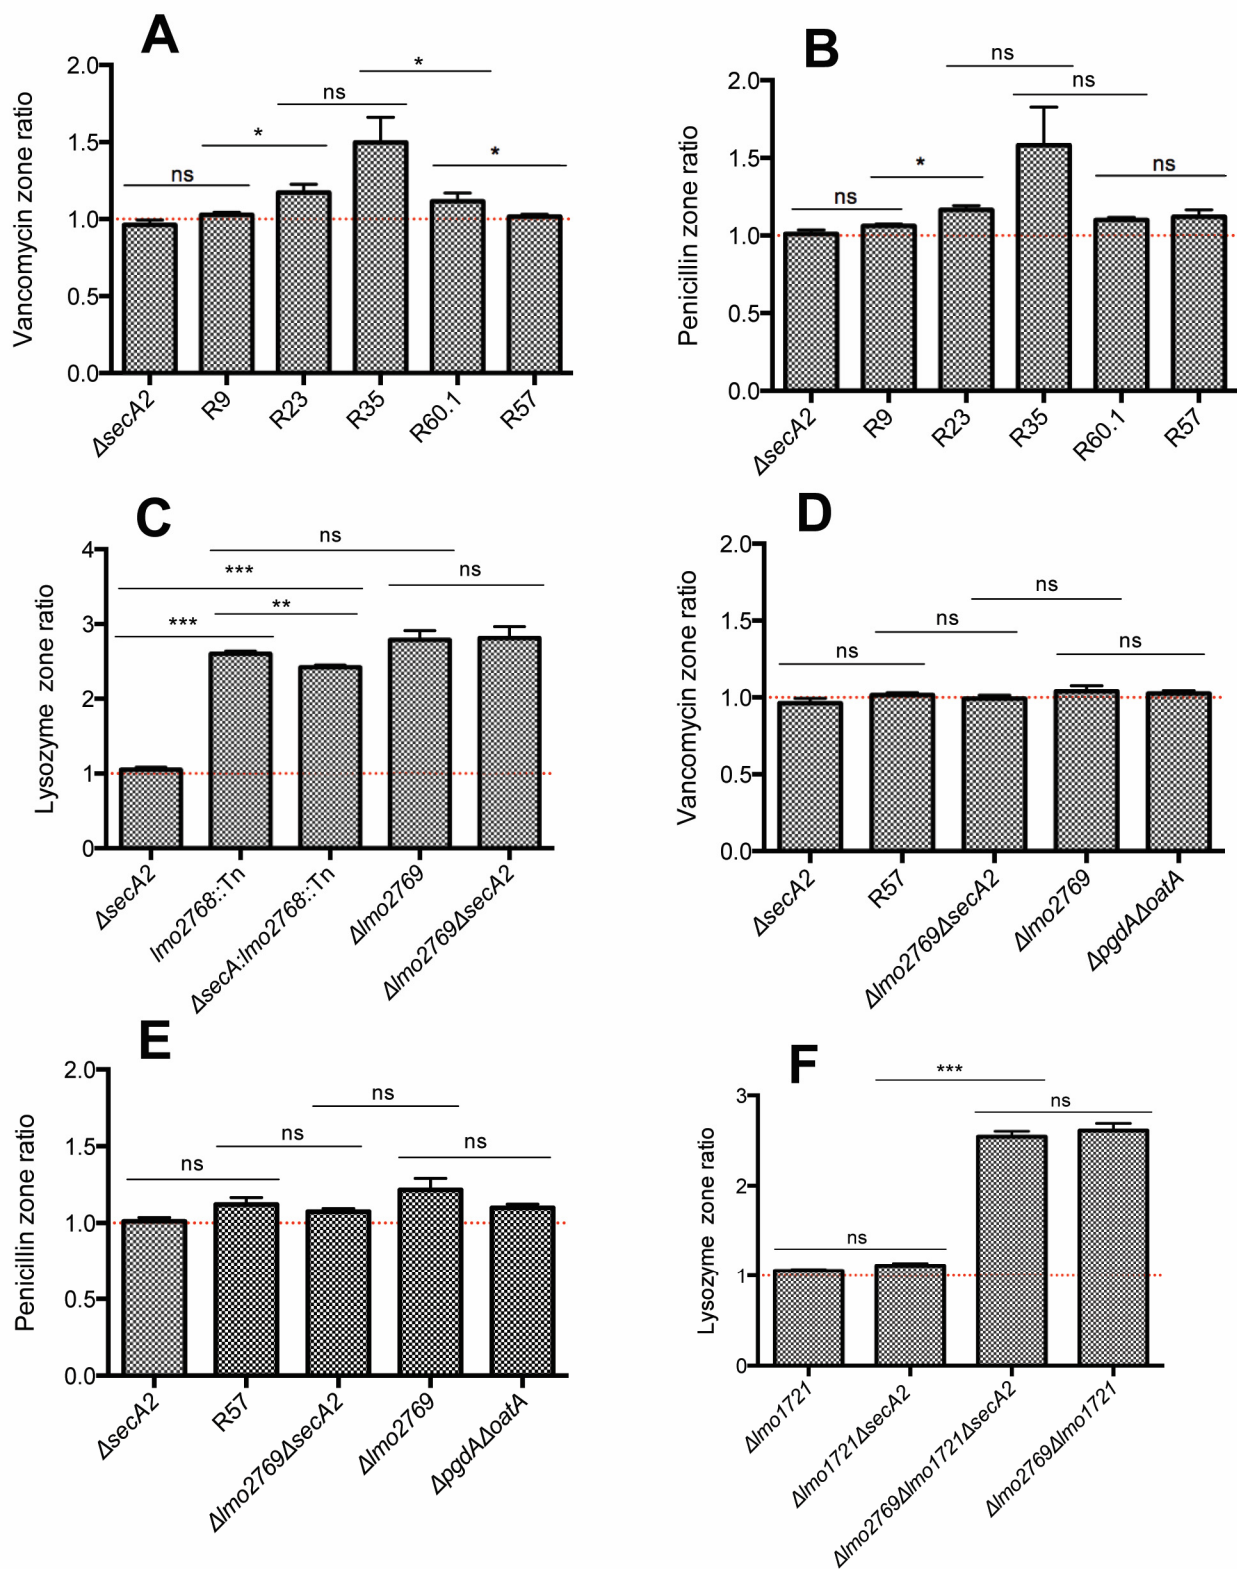

11 **Figure S1:** A and D) Disk diffusion susceptibility to 10  $\mu$ g of vancomycin, B and E) 120  $\mu$ g of  
 12 penicillin and C and F) 1mg of lysozyme expressed as ratio of WT, where a ratio >1 indicates  
 13 increased susceptibility. Error bars represent standard deviations of the mean zone ratio of WT.  
 14 Student's t- test was used to analyze statistical significance where \*\*\*,  $P < 0.0001$  and ns-  $P \geq$   
 15 0.05.  
 16

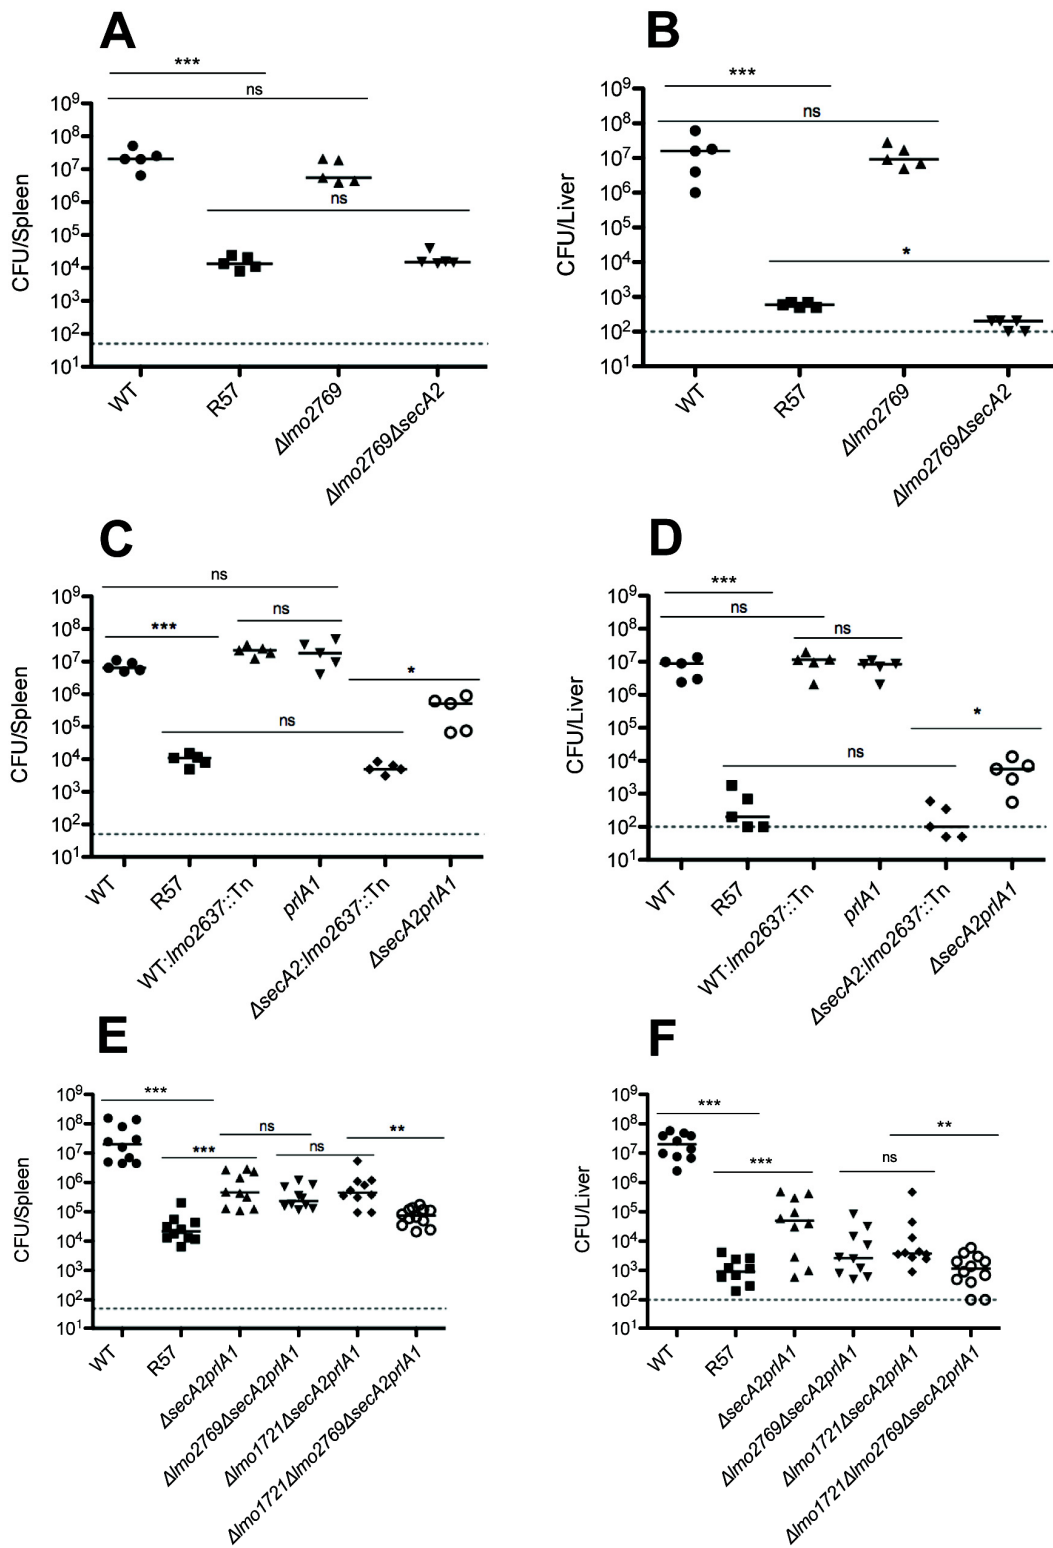

17  
 18 **Figure S2: *In vivo* virulence of assorted mutants.** Bacterial burdens in spleens and livers 48hr  
 19 post infection with  $1 \times 10^5$  CFU in CD1 mice. The dashed-line represents the limit of detection.  
 20 Statistical significance was evaluated using Mann Whitney test. \*\*\*  $P < 0.0001$ , ns -  $P \geq 0.05$ .

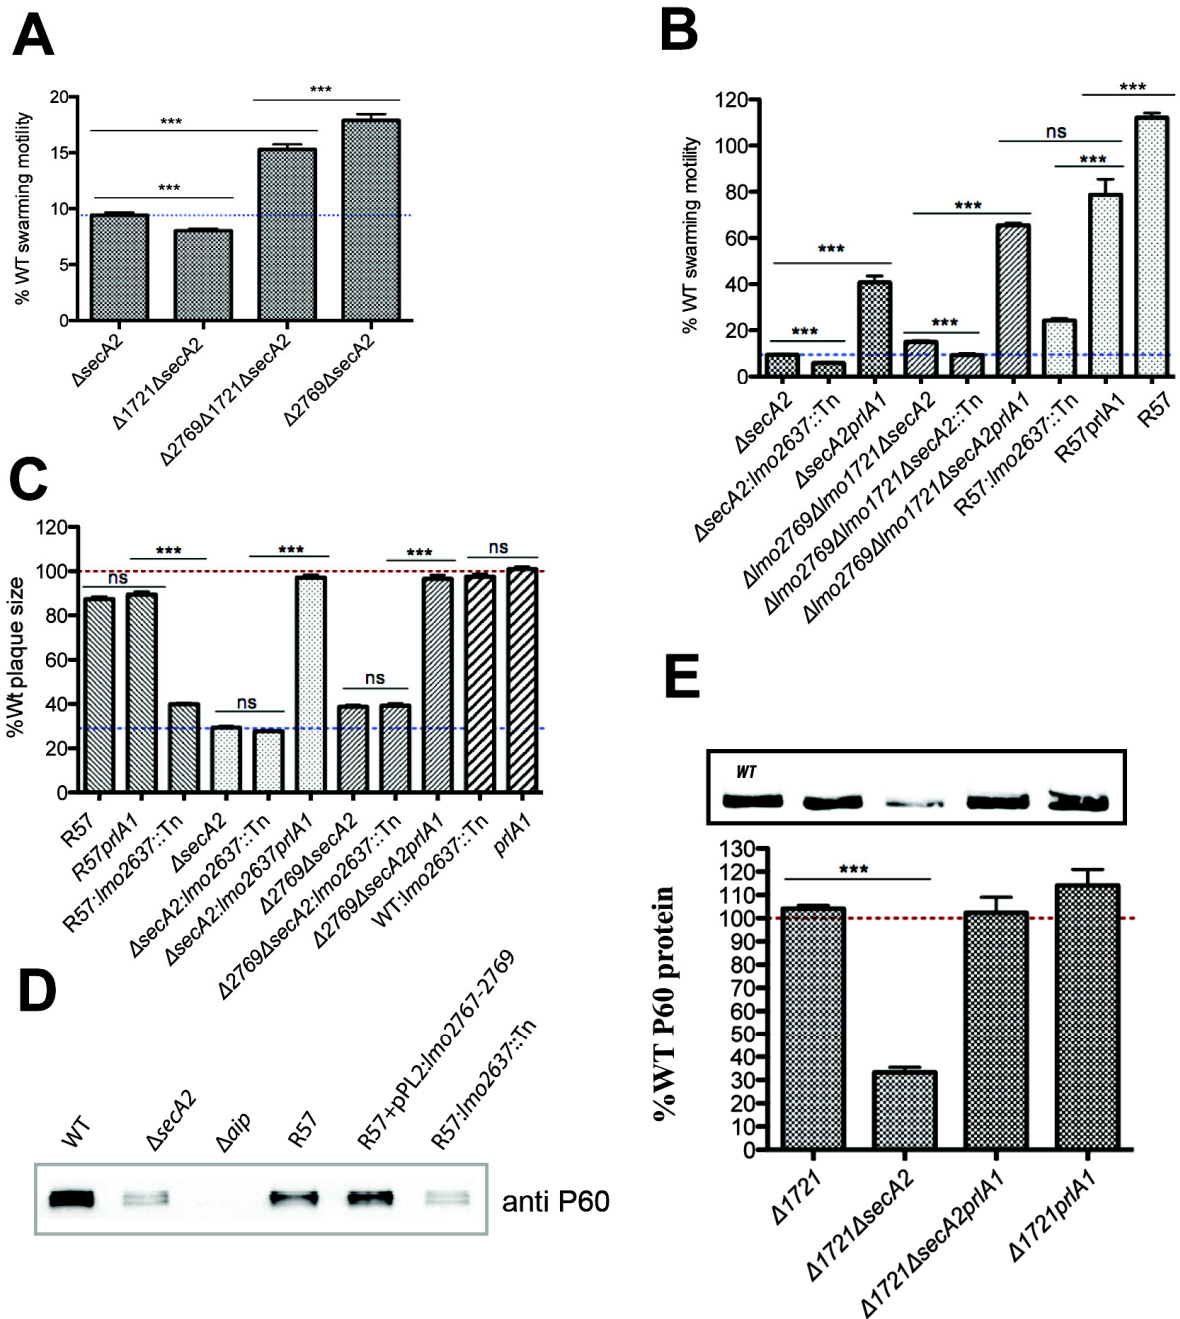

21  
 22 **Figure S3:** Swarming motility of *lmo1721* A) and *lmo2637::Tn* B) mutants was assessed on  
 23 semi-solid LB agar following incubation at 30°C after 48hr. Motility is expressed as a percentage  
 24 of swarming area of the WT strain. Error bars represent standard deviations of the mean zone  
 25 ratio between three independent experiments. C) Plaque area of each mutant is shown as a  
 26 percentage when compared to the WT strain. Error bars represent standard deviations from the  
 27 mean between three independent experiments. Student's t- test was used to analyze statistical  
 28 significance where \*\*\*,  $P < 0.0001$ ; \*,  $P < 0.05$  and ns-  $P \geq 0.05$ . D) An image of a western blot  
 29 showing P60 in supernatants from mid-log (5h) cultured cells in LB broth. E) Secreted levels of  
 30 P60 in supernatants from mid-log (5h) cultured cells in LB broth expressed as a percentage of  
 31 protein secreted by the WT strain.

32 **References**

- 33
- 34 1 **Bishop DK, Hinrichs DJ.** 1987. Adoptive transfer of immunity to *Listeria*  
35 *monocytogenes*: the influence of *in vitro* stimulation on lymphocyte subset requirements.  
36 J Immunol **139**:2005–2009  
37
- 38 2 **Lenz LL, Portnoy DA.** 2002. Identification of a second *Listeria secA* gene associated  
39 with protein secretion and the rough phenotype. Mol Microbiol **45**:1043–1056.  
40
- 41 3 **Rae CS, Geissler, A, Adamson, PC, Portnoy DA.** 2011. Mutations of the *Listeria*  
42 *monocytogenes* peptidoglycan *N*-deacetylase and *O*-acetylase result in enhanced  
43 lysozyme sensitivity, bacteriolysis and hyperinduction of innate immune pathways. Infect  
44 Immun **79**:3596-3606.  
45
- 46 4 **Lenz LL, Mohammadi S, Geissler A, Portnoy DA.** 2003. SecA2-dependent secretion  
47 of autolytic enzymes promotes *Listeria monocytogenes* pathogenesis. Proc Natl Acad Sci  
48 USA **100**:12432–12437.  
49
- 50 5 **Burke TP, Loukitcheva A, Zemansky J, Wheeler R, Boneca IG, Portnoy DA.** 2014.  
51 *Listeria monocytogenes* is resistant to lysozyme by the regulation, not acquisition, of  
52 cell wall modifying enzymes. J Bacteriol **196**:3756-3767
